# Supplementary material
Source: PubMed Central journal article supplement (PMC4599578)
Supplement: NIHMS724079-supplement-Supplemental_Content.pdf [file NIHMS724079-supplement-Supplemental_Content.pdf]

## Supplementary Material

### Supplemental Tables

**Table S1.** Forward and reverse primer sequences used in rtPCR validation of microarray expression data in transformed D-SWCNT, D-MWCNT and ASB human small airway epithelial cells.

| Gene   | GenBank                 | Forward (5' → 3')                               | Reverse (3' → 5')                          |
|--------|-------------------------|-------------------------------------------------|--------------------------------------------|
| ANTXR  |                         |                                                 |                                            |
| 1      | NM_053034<br>NM_004050. | GCTCTCCTCTGGTGGTTCTG                            | TGGAGGGACCTCCTTGATAA                       |
| BCL2L2 | 3                       | GATGGTGGCCTACCTGGAG<br>ACTATGAAGAATTCAGCAAAGAGA | CGTCCCCGTATAGAGCTGTG                       |
| CASP8  | NM_033358<br>NM_000088. | GA                                              | GTATCCCCGAGGTTTGCTTT                       |
| COL1A1 | 3<br>NM_005103.         | GGGATTCCCTGGACCTAAAG                            | GGAACACCTCGCTCTCCA                         |
| FEZ1   | 3<br>NM_005252.         | GGCAACTGCTCTGACACTGA                            | AGGCTCCTCGTTGATACCG                        |
| FOS    | 3                       | CTACCACTCACCCGCAGACT                            | AGGTCCGTGCAGAAGTCCT                        |
| IL8    | NM_000584               | AGACAGCAGAGCACACAAGC                            | ATGGTTCCTTCCGGTGGT<br>TGTACCAGCCCGTTCATATC |
| LAMA4  | NM_002290               | TGCACAGGACCTTCAACAAG                            | T                                          |
| MYC    | NM_002467.              | CACCAGCAGCGACTCTGA                              | GATCCAGACTCTGACCTTTT                       |

|       |            |                          |                       |
|-------|------------|--------------------------|-----------------------|
|       | 4          |                          | GC                    |
|       | NM_002502. |                          |                       |
| NFKB2 | 3          | CACATGGGTGGAGGCTCT       | ACTGGTAGGGGCTGTAGGC   |
| PLAU  | NM_002658  | TTGCTCACCAACGACATT       | GGCAGGCAGATGGTCTGTAT  |
|       | NM_005037. |                          | GGGGTGATGTGTTTGA ACTT |
| PPARG | 5          | GACAGGAAAGACAACAGACAAATC | G                     |

---

**Table S2.** Top-ranked disease functions for saline (SAL), D-UFCB, D-SWCNT, D-MWCNT, and ASB-exposed small airway epithelial cells compared to dispersant-only exposed cells.

| Disease function               | - Log<br>value | p- | Number<br>of<br>genes |
|--------------------------------|----------------|----|-----------------------|
| <b><i>SAL</i></b>              |                |    |                       |
| Cancer                         | 20.36          |    | 308                   |
| Genetic Disorder               | 17.76          |    | 36                    |
| Neurological Disease           | 12.18          |    | 102                   |
| Gastrointestinal Disease       | 12.00          |    | 109                   |
| Immunological Disease          | 10.92          |    | 189                   |
| Reproductive System<br>Disease | 10.78          |    | 103                   |
| <b><i>D-UFCB</i></b>           |                |    |                       |
| Cancer†                        | 10.01          |    | 310                   |
| Genetic Disorder               | 8.71           |    | 548                   |
| Neurological Disease           | 6.51           |    | 334                   |

|                          |        |       |     |
|--------------------------|--------|-------|-----|
| Reproductive Disease     | System | 5.67  | 46  |
| Gastrointestinal Disease |        | 4.80  | 86  |
| Immunological Disease    |        | 4.25  | 229 |
| <b><i>D-SWCNT</i></b>    |        |       |     |
| Cancer                   |        | 27.24 | 401 |
| Genetic Disorder         |        | 24.29 | 722 |
| Neurological Disease     |        | 18.54 | 455 |
| Gastrointestinal Disease |        | 14.00 | 131 |
| Hematological Disease    |        | 11.69 | 251 |
| Reproductive Disease     | System | 9.71  | 127 |
| <b><i>D-MWCNT</i></b>    |        |       |     |
| Cancer                   |        | 21.96 | 277 |
| Neurological Disease     |        | 17.03 | 318 |
| Genetic Disorder         |        | 14.60 | 471 |
| Gastrointestinal Disease |        | 12.13 | 94  |
| Hematological Disease    |        | 11.29 | 179 |

|                                 |       |     |
|---------------------------------|-------|-----|
| Skeletal and Muscular Disorders | 11.16 | 237 |
| <b>ASB</b>                      |       |     |
| Cancer                          | 19.68 | 228 |
| Inflammatory Response*          | 16.04 | 116 |
| Connective Tissue Disorders     | 14.40 | 128 |
| Inflammatory Disease*           | 14.40 | 128 |
| Skeletal and Muscular Disorders | 14.40 | 128 |
| Immunological Disease           | 11.32 | 147 |

---

\* and † indicate diseases predicted to be activated/inhibited, respectively ( $Z \geq \pm 2$ ).

## Supplementary Figures:-

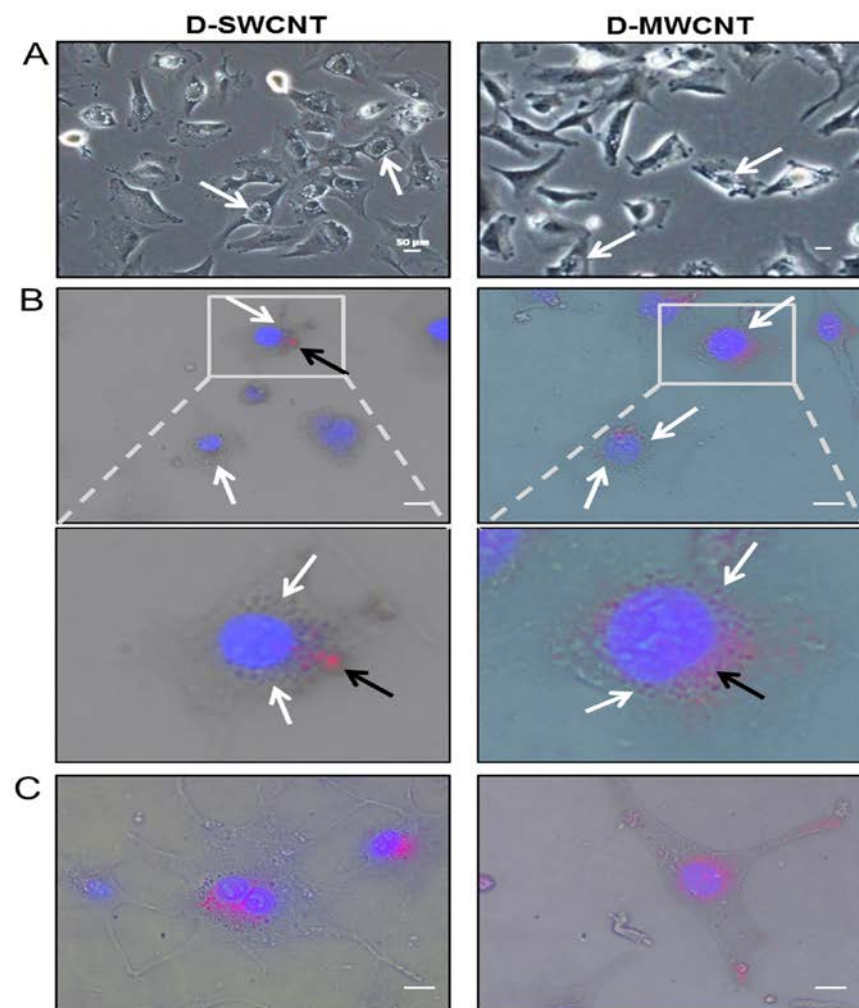

**Figure S1.** Morphological characteristics of D-SWCNT and D-MWCNT exposed (6-month) human small airway epithelial cells. A) Both D-CNT cells displayed numerous intracellular vesicles surrounding nucleus (white arrows). B) Fluorescent images of agglutinin-stained Golgi (Invitrogen; black arrows) overlaid with blue Hoescht 33342-stained nucleus did not co-localize with vesicles. Both Golgi apparatus (B; lower panels) and lysosome staining (LysoTracker; Invitrogen; not shown) showed close proximity to vesicles. C) Giant cell morphology in D-CNT cells. Reverse-phase digital micrographs were captured on an Olympus X70 scope with a mounted Retiga camera. Reverse-phase and fluorescent images were overlaid in Photoshop CS5. Bar = 50  $\mu\text{m}$ .

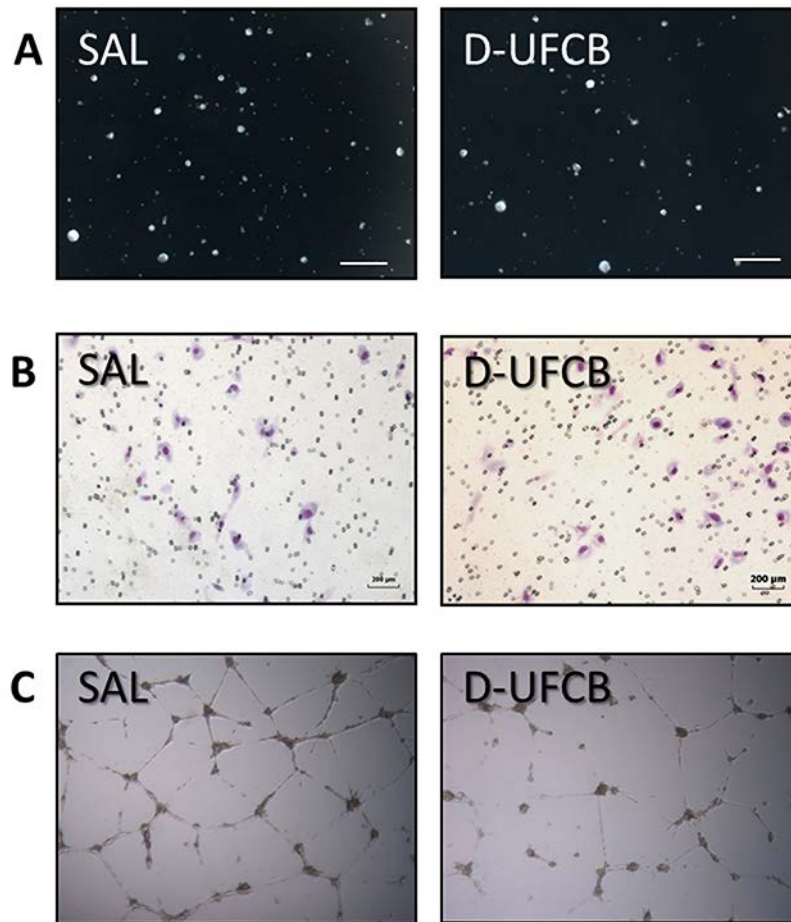

**Figure S2.** Representative transformed phenotype microphotographs for SAL and D-UFCB SAECs. A) Anchorage-independent growth; bar = 500  $\mu\text{m}$  B) Transwell chemotaxis invasion assay C) Angiogenesis assay.

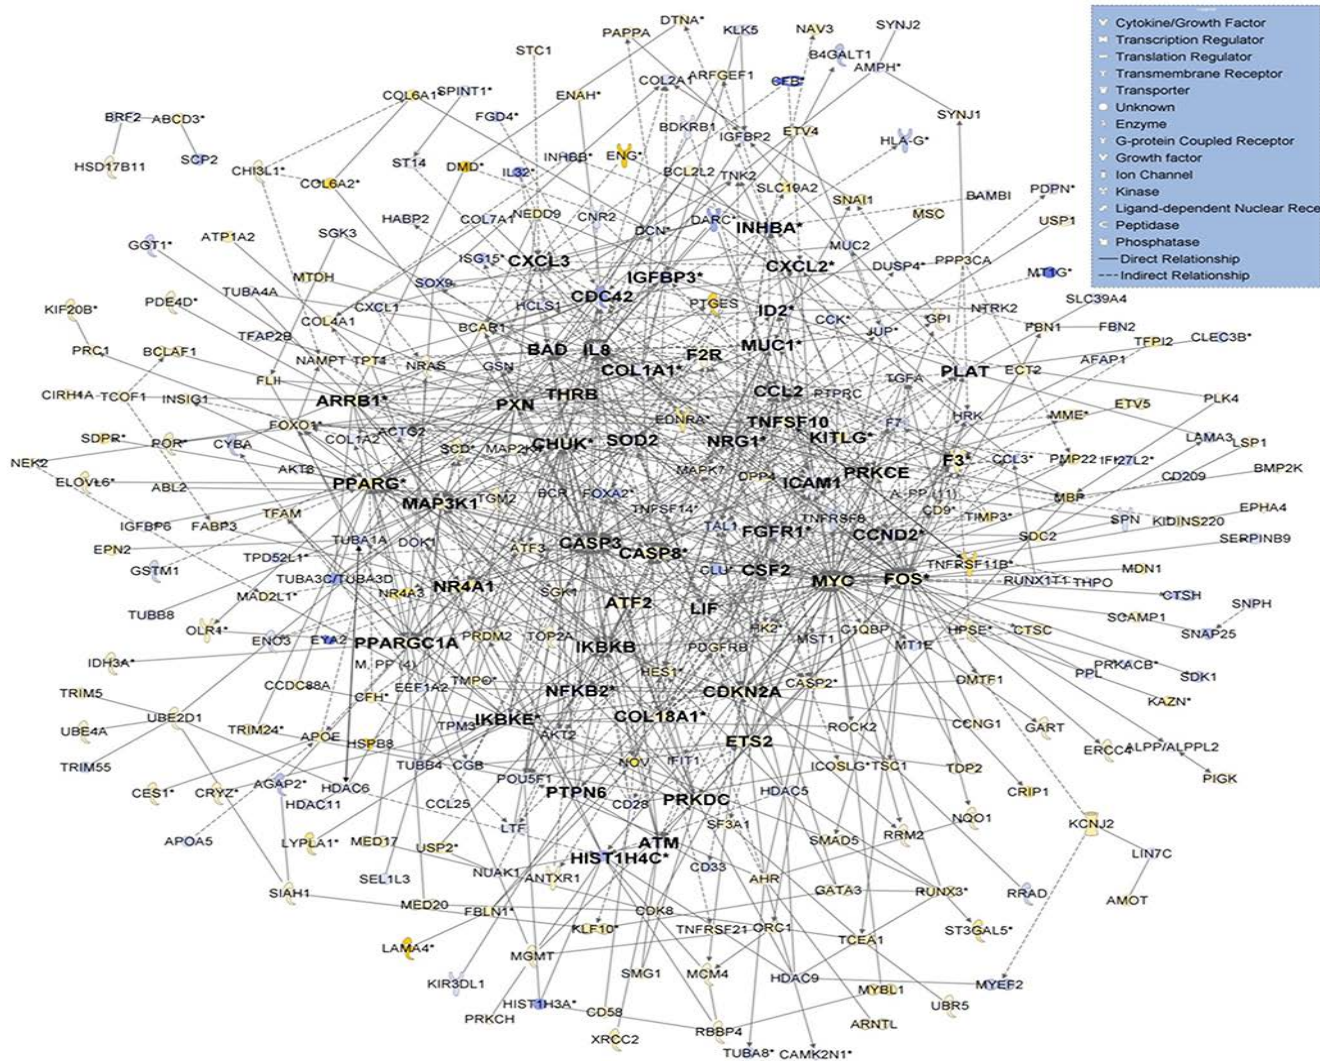

**Figure S3.** Cancer promotion related gene signaling network (GSN) in human small airway epithelial cells subchronically exposed to dispersed SWCNT. Genes were included in the network if they affect cancer, were over-expressed and promote cancer, or down-regulated and inhibit cancer. Genes passing the network filter, but with no signaling relationships are not shown. Large font genes indicate hubs in the GSN. Yellow and blue indicate over- and under-expressed genes compared to dispersant-only control cells.



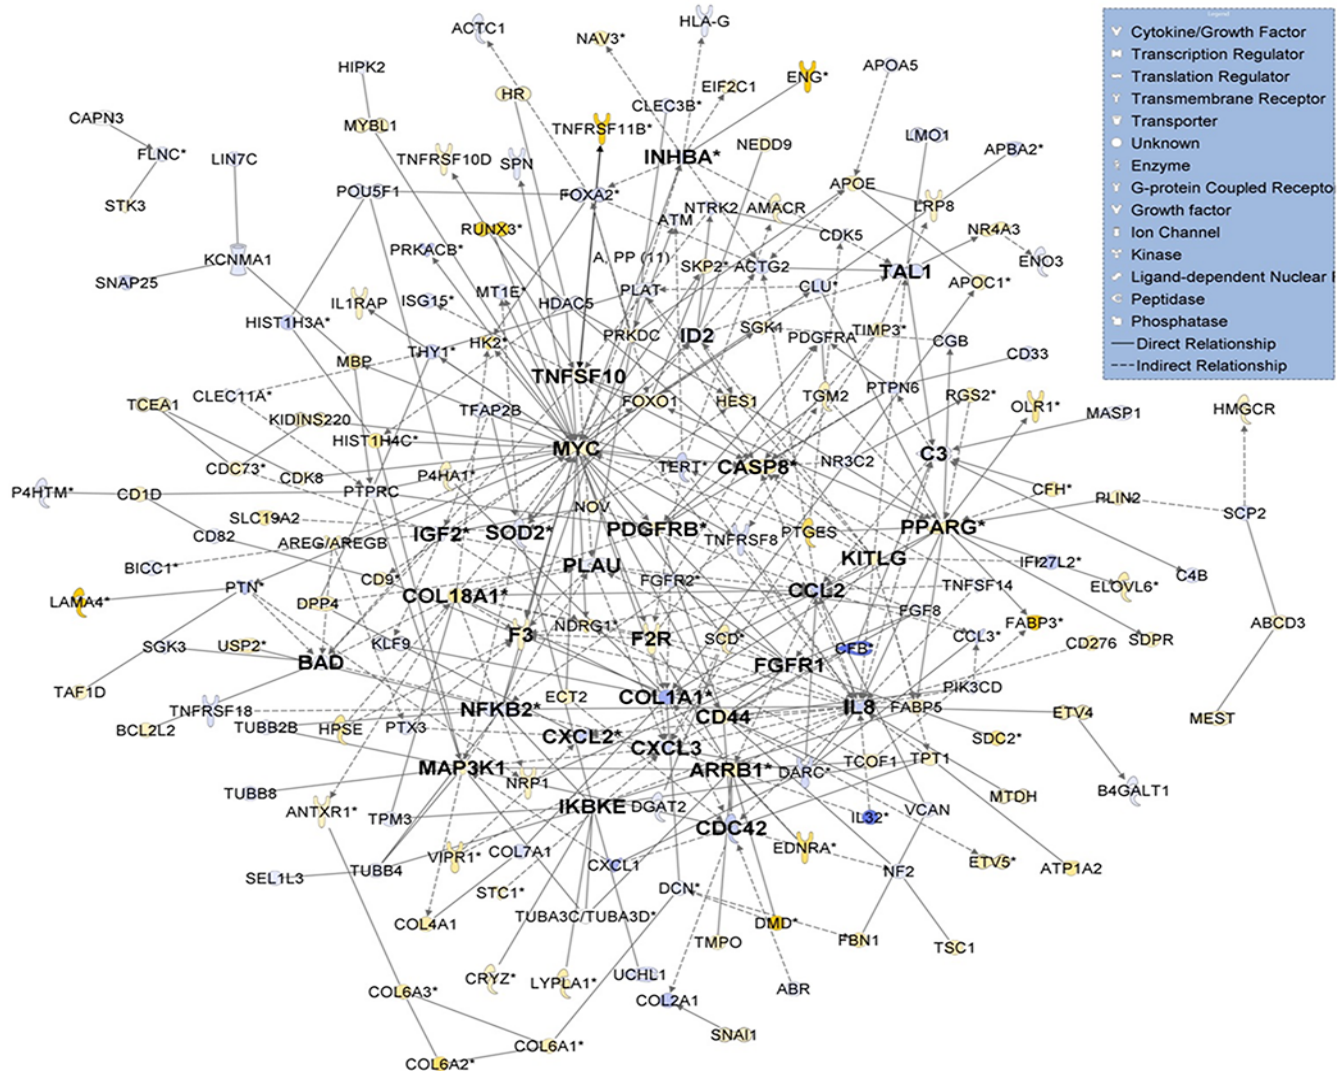

**Figure S4.** Cancer promotion related gene signaling network (GSN) in human small airway epithelial cells subchronically exposed to dispersed MWCNT. Genes were included in the network if they affect cancer, were over-expressed and promote cancer, or down-regulated and inhibit cancer. Genes passing the network filter, but with no signaling relationships are not shown. Large font genes indicate hubs in the GSN. Yellow and blue indicate over- and under-expressed genes compared to dispersant-only control cells.

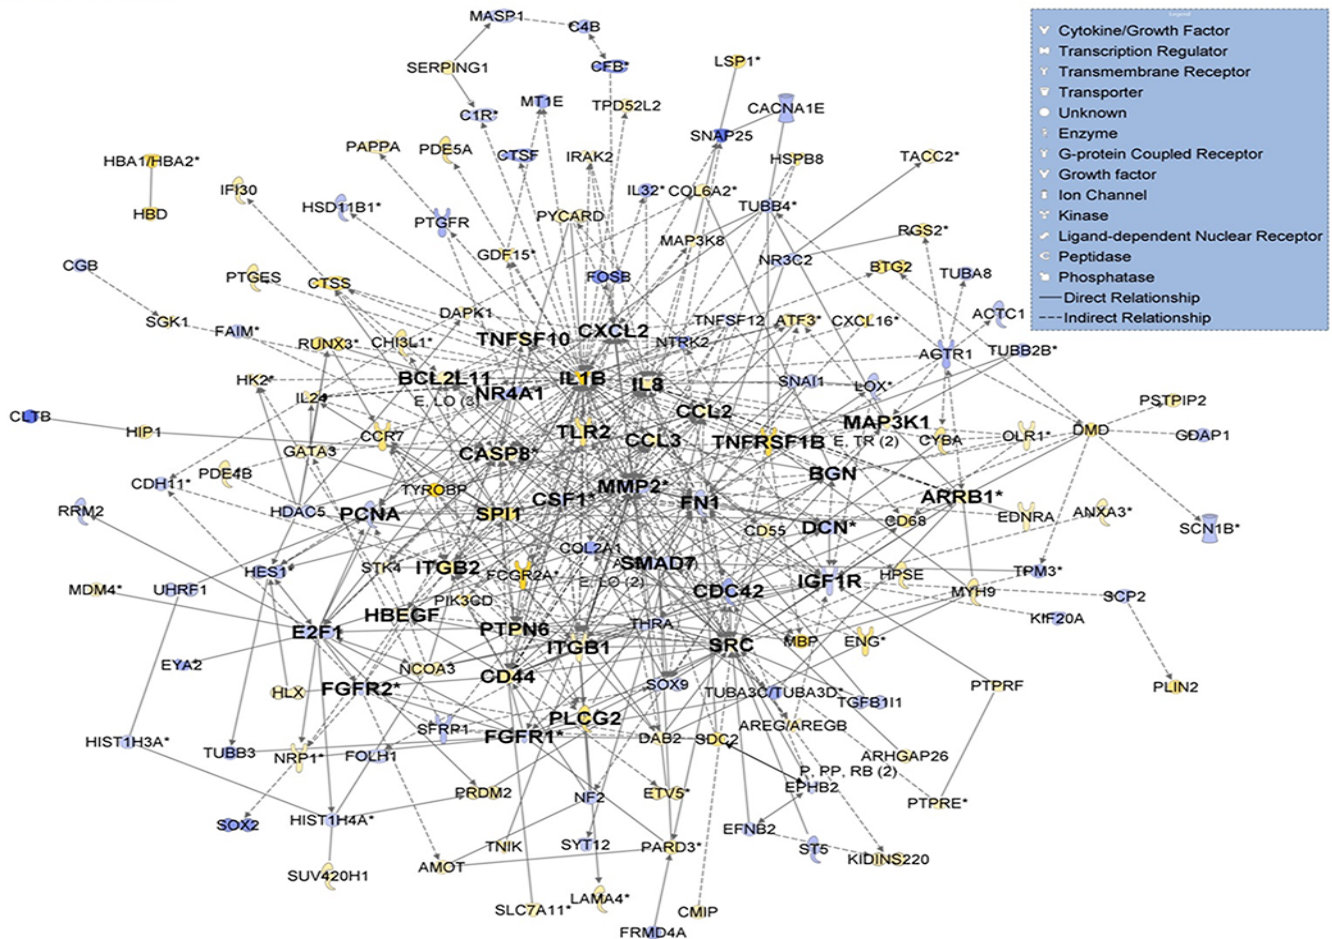

**Figure S5.** Cancer promotion related gene signaling network (GSN) in human small airway epithelial cells subchronically exposed to dispersed crocidolite asbestos. Genes were included in the network if they affect cancer, were over-expressed and promote cancer, or down-regulated and inhibit cancer. Genes passing the network filter, but with no signaling relationships are not shown. Large font genes indicate hubs in the GSN. Yellow and blue indicate over- and under-expressed genes compared to dispersant-only control cells.

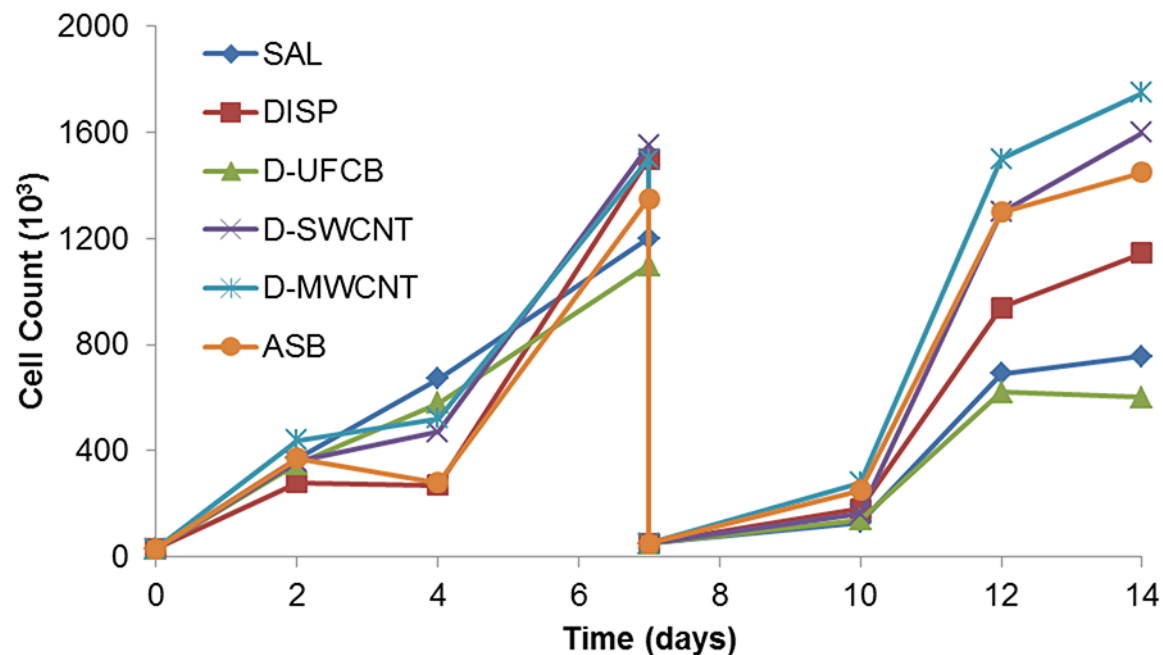

**FOR REVIEW ONLY**

**Figure S6.** Representative growth curves over a two week period of human small airway epithelial cells during subchronic exposure ( $0.02 \mu\text{g}/\text{cm}^2$ ) to dispersed ultrafine carbon black (D-UFCB), single- (D-SWCNT), multi-walled carbon nanotubes (D-MWCNT) and crocidolite asbestos (ASB). Passaged saline (SAL) and dispersant-only (DISP) cells served as controls.  $5 \times 10^4$  cells were plated into 6-well plates in triplicate for each particle exposure. Every two days, one replicate from each treatment was suspended via trypsinization, spun down and resuspended in 1 mL of culture medium. Suspended cells were assayed for live cell number by trypan blue exclusion staining. On Day 7, all triplicates were repeated at initial seeding density.
